# Supplementary material
Source: ML conference proceedings conference paper supplement (https://openaccess.thecvf.com/content/cvpr_2015/html/Faraki_More_About_VLAD_2015_CVPR_paper.html)
Supplement: Supplementary file 1 [file Faraki_More_About_VLAD_2015_CVPR_supplemental.pdf]

# More About VLAD: A Leap from Euclidean to Riemannian Manifolds

## Supplementary Material

Masoud Faraki                      Mehrtash T. Harandi                      Fatih Porikli  
 College of Engineering and Computer Science, Australian National University, Australia  
 NICTA, Canberra Research Laboratory, Australia  
 {masoud.faraki,mehrtash.harandi,fatih.porikli}@nicta.com.au

In this supplementary material, we provide the proofs of Theorem 3 and Theorem 4 in the paper. The Theorem 3 states that the Fréchet mean of a set of SPD matrices based on the Jeffrey divergence,  $\delta_J$ , admits a closed form solution.

**Theorem 3.** *The Fréchet mean of a set of SPD matrices  $\{\mathbf{X}_i\}_{i=1}^m \in \mathcal{S}_{++}^d$  with  $\delta_J$  is*

$$\boldsymbol{\mu} = \mathbf{P}^{-1/2}(\mathbf{P}^{1/2}\mathbf{Q}\mathbf{P}^{1/2})^{1/2}\mathbf{P}^{-1/2}, \quad (1)$$

where  $\mathbf{P} = \sum_i \mathbf{X}_i^{-1}$  and  $\mathbf{Q} = \sum_i \mathbf{X}_i$ .

*Proof.* The solution is obtained by zeroing out the derivative of  $\sum_i \delta_J^2(\mathbf{X}_i, \boldsymbol{\mu})$  with respect to  $\boldsymbol{\mu}$ . At  $\boldsymbol{\mu}$ ,  $\frac{\partial \delta_J^2(\mathbf{X}_i, \boldsymbol{\mu})}{\partial \boldsymbol{\mu}} = \frac{1}{2}(\mathbf{X}_i^{-1} - \boldsymbol{\mu}^{-1}\mathbf{X}_i\boldsymbol{\mu}^{-1})$ , we get

$$\begin{aligned} \frac{\partial \sum_i \delta_J^2(\mathbf{X}_i, \boldsymbol{\mu})}{\partial \boldsymbol{\mu}} &= \sum_{i=1}^m \mathbf{X}_i^{-1} - \sum_{i=1}^m \boldsymbol{\mu}^{-1}\mathbf{X}_i\boldsymbol{\mu}^{-1} = 0 \\ \Rightarrow \boldsymbol{\mu} \sum_{i=1}^m \mathbf{X}_i^{-1} \boldsymbol{\mu} &= \sum_{i=1}^m \mathbf{X}_i. \end{aligned} \quad (2)$$

The quadratic equation  $\mathbf{A}\mathbf{B}\mathbf{A} = \mathbf{C}$  is called a *Riccati* equation [1] and has the following unique and closed form solution for  $\mathbf{B} \succ 0$  and  $\mathbf{C} \succeq 0$

$$\mathbf{A} = \mathbf{B}^{-1/2}(\mathbf{B}^{1/2}\mathbf{C}\mathbf{B}^{1/2})^{1/2}\mathbf{B}^{-1/2}$$

Comparing the form of (2) with the Riccati equation concludes the proof. We note that a different proof is also provided in [3].  $\square$

Similarly the Theorem 4 states that, for a set of linear subspaces under the projection metric,  $\delta_P$ , we have the luxury of obtaining the Fréchet mean analytically.

**Theorem 4.** *The Fréchet mean for a set of points  $\{\mathbf{X}_i\}_{i=1}^m$ ,  $\mathbf{X}_i \in \mathcal{G}_d^p$  based on  $\delta_P$  admits a closed-form solution.*

*Proof.* We need to solve

$$\begin{aligned} \boldsymbol{\mu}^* &\triangleq \arg \min_{\boldsymbol{\mu}} \sum_{i=1}^m \left\| \boldsymbol{\mu}\boldsymbol{\mu}^T - \mathbf{X}_i\mathbf{X}_i^T \right\|_F^2, \quad (3) \\ \text{s.t. } \boldsymbol{\mu}^T \boldsymbol{\mu} &= \mathbf{I}_p. \end{aligned}$$

We note that with the orthogonality constraint on points, i.e.,  $\boldsymbol{\mu}^T \boldsymbol{\mu} = \mathbf{X}_i^T \mathbf{X}_i = \mathbf{I}_p$

$$\begin{aligned} \sum_{i=1}^m \left\| \boldsymbol{\mu}\boldsymbol{\mu}^T - \mathbf{X}_i\mathbf{X}_i^T \right\|_F^2 &= 2mp - 2 \sum_{i=1}^m \text{Tr}\{\boldsymbol{\mu}^T \mathbf{X}_i\mathbf{X}_i^T \boldsymbol{\mu}\} \\ &= 2mp - 2 \text{Tr}\{\boldsymbol{\mu}^T \left( \sum_{i=1}^m \mathbf{X}_i\mathbf{X}_i^T \right) \boldsymbol{\mu}\}. \end{aligned}$$

Therefore to minimize (3), one should maximize  $\text{Tr}\{\boldsymbol{\mu}^T \left( \sum_{i=1}^m \mathbf{X}_i\mathbf{X}_i^T \right) \boldsymbol{\mu}\}$  by taking into account the constraint  $\boldsymbol{\mu}^T \boldsymbol{\mu} = \mathbf{I}_p$ , i.e.,

$$\begin{aligned} \boldsymbol{\mu}^* &\triangleq \arg \max_{\boldsymbol{\mu}} \text{Tr}\{\boldsymbol{\mu}^T \left( \sum_{i=1}^m \mathbf{X}_i\mathbf{X}_i^T \right) \boldsymbol{\mu}\}, \quad (4) \\ \text{s.t. } \boldsymbol{\mu}^T \boldsymbol{\mu} &= \mathbf{I}_p. \end{aligned}$$

The solution of (4) is obtained by computing the  $p$  largest eigenvectors of  $\sum_{i=1}^m \mathbf{X}_i\mathbf{X}_i^T$  according to the Rayleigh-Ritz theorem [2], which concludes the proof.  $\square$

### References

- [1] R. Bhatia. *Positive Definite Matrices*. Princeton University Press, 2007. 1
- [2] R. A. Horn and C. R. Johnson. *Matrix analysis*. Cambridge University Press, 2012. 1
- [3] Z. Wang and B. C. Vemuri. An affine invariant tensor dissimilarity measure and its applications to tensor-valued image segmentation. In *Proc. IEEE Conference on Computer Vision and Pattern Recognition (CVPR)*, volume 1, pages 223–228. IEEE, 2004. 1
